1 **The effect of stimulus choice on an EEG-based objective measure of speech**

2 **intelligibility**

3 **Eline Verschueren<sup>a,\*</sup>, Jonas Vanthornhout<sup>a</sup> and Tom Francart<sup>a</sup>**

4 <sup>a</sup> *Research Group Experimental Oto-rhino-laryngology (ExpORL), Department of*  
5 *Neurosciences, KU Leuven - University of Leuven, 3000 Leuven, Belgium*

6 Correspondence\*:

7 Eline Verschueren

8 Herestraat 49, bus 721, 3000 Leuven, Belgium

9 fax: +3216330478

10 Tel: +32163294521

11 [eline.verschueren@kuleuven.be](mailto:eline.verschueren@kuleuven.be)

12 **Conflicts of Interest and Source of Funding**

13 This project has received funding from the European Research Council (ERC) under the  
14 European Union's Horizon 2020 research and innovation programme (grant agreement  
15 No 637424 to Tom Francart). Further support came from KU Leuven Special Research  
16 Fund under grant OT/14/119. Research of Jonas Vanthornhout (1S10416N) and Eline  
17 Verschueren (1S86118N) is funded by a PhD grant of the Research Foundation  
18 Flanders (FWO). The authors declare no conflict of interest.

## 19 **ABSTRACT**

20 **Objectives** Recently an objective measure of speech intelligibility, based on brain  
21 responses derived from the electroencephalogram (EEG), has been developed using  
22 isolated Matrix sentences as a stimulus. We investigated whether this objective  
23 measure of speech intelligibility can also be used with natural speech as a stimulus, as  
24 this would be beneficial for clinical applications.

25 **Design** We recorded the EEG in 19 normal-hearing participants while they listened to  
26 two types of stimuli: Matrix sentences and a natural story. Each stimulus was presented  
27 at different levels of speech intelligibility by adding speech weighted noise. Speech  
28 intelligibility was assessed in two ways for both stimuli: (1) behaviorally and (2)  
29 objectively by reconstructing the speech envelope from the EEG using a linear decoder  
30 and correlating it with the acoustic envelope. We also calculated temporal response  
31 functions (TRFs) to investigate the temporal characteristics of the brain responses in the  
32 EEG channels covering different brain areas.

33 **Results** For both stimulus types the correlation between the speech envelope and the  
34 reconstructed envelope increased with increasing speech intelligibility. In addition,  
35 correlations were higher for the natural story than for the Matrix sentences. Similar to  
36 the linear decoder analysis, TRF amplitudes increased with increasing speech  
37 intelligibility for both stimuli. Remarkable is that although speech intelligibility remained  
38 unchanged in the no noise and +2.5 dB SNR condition, neural speech processing was  
39 affected by the addition of this small amount of noise: TRF amplitudes across the entire  
40 scalp decreased between 0 to 150 ms, while amplitudes between 150 to 200 ms

41 increased in the presence of noise. TRF latency changes in function of speech  
42 intelligibility appeared to be stimulus specific: The latency of the prominent negative  
43 peak in the early responses (50-300 ms) increased with increasing speech intelligibility  
44 for the Matrix sentences, but remained unchanged for the natural story.

45 **Conclusions** These results show (1) the feasibility of natural speech as a stimulus for  
46 the objective measure of speech intelligibility, (2) that neural tracking of speech is  
47 enhanced using a natural story compared to Matrix sentences and (3) that noise and  
48 the stimulus type can change the temporal characteristics of the brain responses. These  
49 results might reflect the integration of incoming acoustic features and top-down  
50 information, suggesting that the choice of the stimulus has to be considered based on  
51 the intended purpose of the measurement.

## 52 1 INTRODUCTION

53 In current clinical practice speech intelligibility is measured behaviorally by asking the  
54 listeners to recall the words or sentences they heard. By doing so, not only the function  
55 of the auditory periphery is measured (Do the speech sounds reach the brain?), but also  
56 individual skills like working memory, language knowledge and cognition. When  
57 measuring speech intelligibility to evaluate the function of a hearing aid, it is desirable to  
58 evaluate the auditory periphery without these extra factors. In addition, the required  
59 active participation of the participant can make these measurements challenging or  
60 even impossible because of poor attention or motivation, especially in small children.

61 To overcome these challenges an objective measure of speech intelligibility, where no  
62 input from the participant is required, would be of great benefit. Previous studies have  
63 shown that the slowly varying speech envelope is essential for speech intelligibility  
64 (Shannon et al., 1995), and that it can be reconstructed from brain responses using  
65 electroencephalography (EEG) or magnetoencephalography (Luo and Poeppel, 2007;  
66 Aiken and Picton, 2008; Ding and Simon, 2011). Correlating the reconstructed envelope  
67 from the brain response with the real acoustic envelope, results in a measure of neural  
68 envelope tracking, which is related to speech intelligibility in mostly the delta (Ding et al.,  
69 2014; Molinaro and Lizarazu, 2017; Vanthornhout et al., 2018) and theta band (Luo and  
70 Poeppel, 2007; Ding and Simon, 2013; Lesenfants et al., 2019a).

71 Vanthornhout et al. (2018) and Lesenfants et al. (2019a) demonstrated the application  
72 of this measure of neural envelope tracking in an objective measure of speech

73 intelligibility using isolated Matrix sentences as a stimulus. Matrix sentences are 5-word  
74 sentences containing a proper name, verb, numeral, adjective and object with 10  
75 options per word category presented randomly (e.g., 'Sofie sees ten blue socks'). In  
76 their studies the same Matrix sentences were used during a standardized behavioral  
77 recall experiment and an EEG measurement, enabling direct comparison of speech  
78 intelligibility to envelope tracking. However, for the purpose of clinical applications, the  
79 use of isolated sentences may be sub-optimal. Sentences do not reflect everyday  
80 communication where syllable, word and sentence rate are less controlled and more  
81 semantic top-down processing is involved. Therefore, an objective measure of speech  
82 intelligibility based on fully natural speech could (1) overcome subject-related factors  
83 such as motivation and therefore possible drops in attention and (2) allow intelligibility  
84 measurements of any speech fragment, which is impossible today using behavioral  
85 measurements but may relate better to everyday communication.

86 In this study we investigate whether the objective measure of speech intelligibility by  
87 Vanthornhout et al. (2018) using Matrix sentences at a wide range of Signal-to-Noise  
88 Ratios (SNRs) can also be conducted with natural running speech, such as a narrated  
89 story. We know stories can be used to measure neural envelope tracking (Ding and  
90 Simon, 2012, 2013; Kong et al., 2014; Petersen et al., 2017) and Ding and Simon  
91 (2013) were able to link neural envelope tracking to speech intelligibility at -3 dB SNR  
92 using a story. By replicating the study of Vanthornhout et al. (2018), we want to  
93 investigate the relation between neural envelope tracking and speech intelligibility at a  
94 wide range of SNRs and compare the use of a natural story to individual sentences to  
95 find the most optimal stimulus for clinical use. We hypothesize neural envelope tracking

96 will not be similar for both stimuli as speech intelligibility relies on the active integration  
97 of two incoming information streams (Hickok and Poeppel, 2007; Anderson et al., 2018):  
98 (1) the bottom-up stream that processes the acoustic features through the auditory  
99 pathway until the auditory cortex and (2) the top-down stream originating in different  
100 brain regions. Brodbeck et al. (2018) review in their introduction how neural tracking of  
101 different speech features has been used to measure top-down and bottom-up  
102 processes. We hypothesize that if neural envelope tracking is mainly a feed-forward  
103 acoustic process, results for Matrix sentences will be enhanced compared to the story  
104 because of the rigid syllable, word and sentence rate reflected in the speech envelope  
105 of the Matrix sentences. If, on the other hand, neural envelope tracking captures the  
106 interaction between the incoming acoustic speech stream and top-down information,  
107 results for the story will be enhanced because of, e.g., increased semantic processing  
108 (Di Liberto et al., 2018; Broderick et al., 2018) and attention (Kerlin et al., 2010; Ding  
109 and Simon, 2012; Mesgarani and Chang, 2012; Vanthornhout et al., 2019).

## 110 **2 MATERIAL AND METHODS**

### 111 **2.1 Participants**

112 Nineteen participants aged between 18 and 28 years (3 men and 16 women) took part  
113 in the experiment after providing informed consent. Participants had Flemish as their  
114 mother tongue and were all normal-hearing, confirmed with pure tone audiometry  
115 (thresholds  $\leq 25$  dB HL at all octave frequencies from 125 Hz to 8 kHz). The study was  
116 approved by the Medical Ethics Committee UZ Leuven / Research (KU Leuven) with

117 reference S57102. All participants were unpaid volunteers.

## 118 **2.2 Auditory stimuli**

119 During the experiment participants listened to three different stimuli: (1) isolated Matrix  
120 sentences, (2) a natural story and (3) another story used to train the linear decoder on.

### 121 2.2.1 Matrix sentences

122 Flemish Matrix sentences contain 5 words spoken by a female speaker and have a  
123 fixed syntactic structure of 'proper name-verb-numeral-adjective-object', for example,  
124 'Sofie sees ten blue socks' with a speech rate of 4.1 syllables/second, 2.5 words/second  
125 and 0.5 sentences/second. Each category of words has 10 alternatives and each  
126 sentence consists of a random combination of these alternatives which induces a rigid  
127 and artificial speech rate and reduces semantic context to a bare minimum. These  
128 sentences are gathered into lists of 20 sentences. Speech was fixed at a level of 60  
129 dBA and the noise level varied across trials. We used speech weighted noise (SWN)  
130 which has the long-term-average spectrum of the stimulus and therefore results in  
131 optimal energetic masking. Matrix sentences are a validated speech material to  
132 measure speech intelligibility which allows us to directly compare EEG results with  
133 speech intelligibility, similar to Vanthornhout et al. (2018) and Lesenfants et al. (2019a).  
134 However, Matrix sentences have a rigid speech rate and lack semantic information,  
135 resulting in an artificial speech stimulus not representative for everyday communication.

### 136 2.2.2 Natural story

137 The natural story we used is 'De Wilde Zwanen', written by Hans Christian Andersen  
138 and narrated in Flemish by Katrien Devos (female speaker) with a speech rate of  
139 approximately 3.5 syllables/second, 2.5 words/second and 0.2 sentences/second.  
140 Speech was fixed at a level of 60 dBA and the noise level of the SWN varied across  
141 trials. The main differences between the Matrix sentences (2.2.1) and fully natural  
142 speech such as this narrated story are:

143 1. *Prosody*: Matrix sentences are part of a standardized speech material where every  
144 word is spoken at the same intensity, while the story is naturally spoken with  
145 intensity variations as a consequence.

146 2. *Speech rate*: Matrix sentences have a rigid syllable, word and sentence rate, while  
147 the story has a naturally varying speech rate because of different word and  
148 sentence lengths.

149 3. *Semantic context*: Matrix sentences are a random combination of words,  
150 minimizing the use of semantic context. The story, on the other hand, is coherent  
151 speech where the use of top-down processing is triggered, e.g., knowledge about  
152 time, space and characters.

153 4. *Lexical prediction*: The permutations of the words are different in each Matrix  
154 sentence, but the words themselves become more familiar to the participants  
155 during the experiment, in contrast to the story.

### 156 2.2.3 Decoder story

157 A children's story, 'Milan', written and narrated in Flemish by Stijn Vranken (male



158 speaker), was presented to the participants with a speech rate of 3.7 syllables/second,  
159 2.6 words/second and 0.3 sentences/second. This story is 14 minutes long and was  
160 presented at a level of 60 dBA without noise. The purpose of this story was to have an  
161 independent continuous stimulus without background noise to train a linear decoder on  
162 (Vanthornhout et al., 2018) to reconstruct the speech envelope from the EEG. We  
163 intentionally selected a story, because a decoder based on Matrix sentences would be  
164 sensitive to sentence onsets, because of the artificially inserted silences, and not to the  
165 envelope.

### 166 **2.3 Behavioral experiment**

167 Speech intelligibility was measured behaviorally in order to compare envelope tracking  
168 results in terms of speech intelligibility. We need to measure speech intelligibility for  
169 both stimuli separately because they differ in content and acoustic parameters (speaker,  
170 speech rate, intonation). Adding a similar level of background noise will therefore not  
171 result in a similar level of speech intelligibility (Decruy et al., 2018).

172 Before the EEG experiment we conducted a Matrix test. This test starts with 2 training  
173 lists followed by 3 testing lists of 20 sentences each at different SNRs: -9.5; -6.5 and -  
174 3.5 dB SNR. Speech was fixed at a level of 60 dB A and the noise level varied in  
175 random order. Speech and noise were presented to the right ear. Participants had to  
176 recall the sentence they heard. By counting the correctly recalled words, a percentage  
177 correct per presented SNR was calculated. Next, a psychometric function was fitted on  
178 the data points, similar to what is done in clinical practice.

179 To measure speech intelligibility for the natural story, we cannot ask the participants to  
180 recall every word, instead we used a rating method during the EEG experiment.  
181 Participants were asked to rate their speech intelligibility with the following question  
182 appearing visually on a screen in front of them: 'Which percentage of the words did you  
183 understand?' at the presented SNRs (-12.5; -9.5; -6.5; -3.5; -0.5 and 2.5 dB SNR). In  
184 addition to the recall procedure for the Matrix sentences before the EEG experiment, we  
185 also asked 9 of the 19 participants to rate their speech intelligibility for the Matrix  
186 sentences during the EEG, similar to the natural story.

## 187 **2.4 EEG experiment**

188 Ten participants started the EEG experiment by listening to Matrix sentences followed  
189 by the natural story. The remaining 9 participants did this in the reversed order. The  
190 decoder story was presented in between. The natural story was cut in 7 equal parts of  
191 approximately 4 minutes long, which we presented in chronological order. The first part  
192 was always presented in silence to optimize comprehension of the storyline. The  
193 following 6 parts were presented at 6 different SNRs in random order: -12.5; -9.5; -6.5; -  
194 3.5; -0.5 and 2.5 dB SNR. The Matrix sentences were concatenated into 7 lists of 40  
195 sentences with a silent gap between the sentences randomly varying between 0.8 and  
196 1.2 seconds. Each 2-minute trial, containing 40 sentences at a particular SNR, was  
197 presented twice to analyze test-retest reliability. The SNRs were the same SNRs as  
198 used for the natural story, also in random order and including the condition without  
199 noise. To maximize attention and keep the participants motivated, questions were  
200 asked about each SNR trial, for example, 'What happened after sunset?' (natural story)

201 or 'Which colors of boats were mentioned?' (Matrix sentences). The answers were not  
202 used for further analysis. After the question, the participants were asked to rate their  
203 speech intelligibility with the following question: 'Which percentage of the words did you  
204 understand?'

## 205 **2.5 Experimental setup**

206 Recordings were made in a soundproof and electromagnetically shielded room.  
207 Speech was presented bilaterally at 60 dBA and the setup was calibrated using a 2cm<sup>3</sup>  
208 coupler of the artificial ear (Brüel & Kjær 4152, Denmark) for each stimulus. The stimuli  
209 were presented using APEX 3 (Francart et al., 2008), an RME Multiface II sound card  
210 (Germany) and Etymotic ER-3A insert phones (Illinois, USA). A 64-channel BioSemi  
211 ActiveTwo (the Netherlands) EEG recording system was used for the EEG recordings at  
212 a sample rate of 8192 Hz. Participants sat in a comfortable chair and were asked to  
213 move as little as possible during the recordings. There was no fixation point, but they  
214 were instructed to keep their eyes open. The participants could see the experimenters  
215 screen where questions appeared. They gave their responses by talking through a  
216 microphone inside the EEG booth. We inserted a small break between the behavioral  
217 and the EEG part and between the Matrix sentences and the natural story if necessary.

## 218 **2.6 Signal processing**

219 In this study we measured neural envelope tracking and linked this to speech  
220 intelligibility and stimulus type (natural story versus isolated Matrix sentences). Neural  
221 envelope tracking was calculated in two ways: We correlated the acoustic speech

222 envelope (2.6.1) with the speech envelope reconstructed from the EEG response  
223 (2.6.2) with the help of a linear decoder. Secondly, we calculated temporal response  
224 functions (TRFs) to investigate the temporal characteristics of the brain responses in the  
225 EEG channels covering the scalp (2.6.3).

#### 226 2.6.1 Acoustic envelope

227 The acoustic speech envelope was extracted from the stimulus according to Biesmans  
228 et al. (2017), using a gammatone filterbank followed by a power law. We used a  
229 filterbank containing 28 channels spaced by 1 equivalent rectangular bandwidth with  
230 center frequencies from 50 Hz until 5000 Hz. The absolute value of each sample in  
231 each channel was raised to the power of 0.6. All 28 channel envelopes were averaged  
232 which resulted in one single envelope. As a next step, the acoustic speech envelope  
233 was band-pass filtered, similar to the EEG signal, in the delta (0.5-4 Hz) or theta (4-8  
234 Hz) frequency band with a Chebyshev filter with 80 dB attenuation at 10% outside the  
235 passband. Only these low frequencies were further processed, because they contain  
236 the information of interest of the slowly varying speech envelope.

#### 237 2.6.2 Envelope reconstruction

238 After applying an anti-aliasing filter, the EEG data was downsampled from 8192 Hz to  
239 256 Hz to reduce processing time and referenced to an average of the electrodes. Next,  
240 EEG artefact rejection was done using a multi-channel Wiener filter (MWF) (Somers et  
241 al., 2018). the MWF was calculated on the long decoder story without noise and applied  
242 on the shorter Matrix and natural story SNR trials. After artefact rejection, the signal was  
243 bandpass filtered, similar to the acoustic speech envelope and the sample rate was

244 further decreased from 256 Hz to 128 Hz. A schematic overview is shown in Figure 1.

245 To enable reconstruction of the speech envelope from the neural data as a measure  
246 of neural envelope tracking, a linear decoder was created in the delta- (0.5-4 Hz) and  
247 theta (4-8 Hz) band separately using the mTRF toolbox (Lalor et al., 2006, 2009) similar  
248 to the decoder used in Vanthornhout et al. (2018). As speech elicits neural responses  
249 with some delay, the decoder not only attributes weights to each EEG channel (spatial  
250 filter), but it also takes the shifted neural responses of each channel into account  
251 (temporal filter), resulting in a matrix  $R$  containing the shifted neural responses of each  
252 channel. If  $g$  is the linear decoder and  $R$  the shifted neural data, the reconstruction of  
253 the speech envelope  $\hat{s}(t)$  was obtained by  $\hat{s}(t) = \sum_n \sum_\tau g(n, \tau) R(t + \tau, n)$  with  $t$  the time  
254 index,  $n$  ranging over the recording electrodes and  $\tau$  ranging over the integration  
255 window, i.e., the number of post-stimulus samples used to reconstruct the envelope.  
256 The decoder was calculated by solving  $g = (RR^T)^{-1}(Rs^T)$  with  $s$  the speech envelope  
257 and applying ridge regression to prevent overfitting. We used an integration window of  
258 250 ms post-stimulus resulting in the decoder matrix  $g$  of 64 (EEG channels) x 33 (time  
259 delays within the integration window). The decoder was created using the Milan story  
260 (14 minutes) without any noise.

261 As a last step the envelope was reconstructed by applying the decoder to both test  
262 stimuli, the Matrix sentences and the natural story, at various noise levels. Each SNR  
263 trial consisted of 2 presentations of 80 seconds of speech after removing the artificially  
264 inserted silences between Matrix sentences varying between 0.8 and 1.2 seconds. To  
265 measure how similar this reconstructed envelope was to the acoustic envelope as a

266 measure for neural envelope tracking, we calculated the bootstrapped Spearman  
267 correlation using Monte Carlo sampling (Pernet et al., 2012) after removing the silences  
268 in the stimulus and the corresponding part in the EEG. Removing the silences is  
269 necessary as the Matrix sentences contain quasi-regular silent gaps between the  
270 sentences which would be a confound. To check whether the obtained correlations  
271 were significant, we calculated the significance level of the correlation by correlating  
272 random permutations of the real and reconstructed envelope 1000 times and taking  
273 percentile 2.5 and 97.5 to obtain a 95% confidence interval. Additionally we calculated  
274 the chance levels of both stimuli to investigate whether the decoder has a preference.  
275 We hypothesized that because the decoder is a story and not a set of Matrix sentences,  
276 the decoder could be better suited to decode the natural story. To obtain the chance  
277 levels we reconstructed the envelope of the natural story similar to the standard  
278 analysis. Next we correlated the reconstructed envelope of each story trial with the  
279 acoustic envelope of all trials of both the natural story (except for the trial used) and the  
280 Matrix sentences and compared both.

### 281 2.6.3 Temporal response function estimation

282 The analysis above integrates all neural activity over channels and time lags, i.e. the  
283 post-stimulus samples used to create the decoder, and requires a decoder trained on a  
284 separate story. To have a closer look at the spatiotemporal profile of the neural  
285 responses and remove the assumption that neural processing is similar for the decoder  
286 story and the test stimuli in different noise conditions, we calculated TRFs. A TRF is a  
287 linear filter that describes how the acoustic speech envelope of the stimulus is  
288 transformed into neural responses. It can be used to predict the EEG from the acoustic

289 envelope. This is the inverse approach of the previously mentioned envelope  
290 reconstruction where the acoustic envelope is reconstructed from the EEG.

291 We calculated a TRF for every electrode channel in every participant per stimulus per  
292 SNR condition. The first signal processing steps are identical to the envelope  
293 reconstruction model starting with downsampling to 256 Hz, artefact rejection with  
294 MWF, filtering (0.5-8 Hz) and further downsampling to 128 Hz. Next, TRFs were  
295 calculated using the boosting algorithm (David et al., 2007; Brodbeck et al., 2018) with  
296 an L2 error norm (using the Eelbrain source code (Brodbeck, 2017)). In summary,  
297 boosting is an iterative algorithm starting from a TRF consisting of zeros. With each  
298 iteration, the mean-squared error (MSE) is calculated for the prediction after changing  
299 all TRF parameters separately by a small amount. The best resulting change after one  
300 iteration (smallest MSE), is added to the TRF. This process is repeated until no further  
301 relevant improvement is possible (David et al., 2007).

302 After calculation, the TRFs were convolved with a rotationally symmetric Gaussian  
303 kernel of 5 samples long (SD=2) to smooth over time lags. To analyze the TRFs in the  
304 time domain, we investigated the latency and amplitude of the negative and positive  
305 peaks occurring within 0 and 500 ms after the stimulus (Ding and Simon, 2011; Obleser  
306 and Kotz, 2011; Ding and Simon, 2012; Ding et al., 2014).

## 307 **2.7 Statistical Analysis**

308 Statistical analysis was performed using MATLAB (version R2016b) and R (version  
309 3.3.2) software. The significance level was set at  $\alpha=0.05$  unless otherwise stated.

310 For the behavioral tests and envelope reconstruction we compared dependent  
311 samples (e.g. test- retest) using a nonparametric Wilcoxon signed-rank test. The  
312 correlation between the acoustical envelope and the envelope reconstructed from the  
313 EEG was correlated with SI for every filter band and every stimulus using Spearman's  
314 rank correlation. Next, we assessed the relationship between speech intelligibility,  
315 envelope reconstruction, filter band and stimulus by constructing a linear mixed effect  
316 (LME) model with the following formula:

$$317 \text{ corr} \sim SI + stimulus + band + SI : band + SI : stimulus + SI : band : stimulus$$

318 where *corr* is defined as the Spearman correlation between the reconstructed and the  
319 acoustic envelope, and fixed and interaction effects of *SI* (speech intelligibility), *stimulus*  
320 (Matrix sentences or natural story) and *band* (the delta or theta filter band). An  
321 additional random effect of intercept of the participants was included in the model to  
322 allow neural tracking to be higher or lower per subject. To control for the different levels  
323 of SNRs used for both stimuli to obtain a same level of SI, we constructed the exact  
324 same model, but in function of SNR instead of SI.

325 To control if every chosen fixed and random effect benefited the model the Akaike  
326 Information Criterion (AIC) was calculated which estimates a goodness-of-fit measure,  
327 while correcting for model complexity. The model with the lowest AIC was selected and  
328 its residual plot was analyzed to assess the normality assumption of the LME residuals.  
329 Unstandardized regression coefficients (beta) with 95% confidence intervals and p-  
330 value are reported in the results section.

331 To investigate which time samples of the TRF were significantly different from zero,



332 we conducted a cluster-based permutation test. To explore the potential significant  
333 differences between the natural story and the Matrix sentences at the different SNRs,  
334 we conducted a cluster-based analysis with a post hoc Bonferroni adjustment explained  
335 in detail by Maris and Oostenveld (2007). Spearman's rank correlation was used to  
336 investigate the possible change of amplitude and latency of the temporal-occipital peaks  
337 over time.

### 338 **3 RESULTS**

#### 339 **3.1 Behavioral speech intelligibility**

340 During the experiment we measured speech intelligibility behaviorally at different  
341 SNRs for every participant. Figure 2 shows that the natural story (rating method) was  
342 significantly more difficult than the Matrix sentences (recall method) ( $p < 0.001$ ,  
343  $CI(95\%) = [15.99; 23.34]$ ,  $n=19$ , Wilcoxon signed-rank test). This indicates that the  
344 same SNR does not result in the same level of speech intelligibility for the different  
345 stimuli. To be able to compare the natural story with the Matrix sentences, we need to  
346 account for this.

347 To check whether the used method to measure speech intelligibility, rate (natural  
348 story) versus recall (Matrix sentences), did not influence the results, we asked 9 of the  
349 participants to rate their speech intelligibility for the Matrix sentences, similar to the  
350 natural story, in addition to the standardized recall method. Comparing their rate and  
351 recall scores for the same Matrix sentences at 3 SNRs did not reveal any significant  
352 difference (-9.5 dB SNR:  $p=0.19$ ,  $CI(95\%)=[-11.50; 22.00]$ ; -6.5 dB SNR:  $p=0.06$ ,

353 CI(95%)=[-29.50; 1.50]; -3.5 dB SNR:  $p=0.41$ , CI(95%)=[-9.00; 2.75];  $n=9$ , Wilcoxon  
354 signed-rank test).

### 355 **3.2 Envelope reconstruction**

356 To measure neural envelope tracking, we calculated the Spearman correlation  
357 between the reconstructed envelope and the acoustic envelope. A test-retest analysis  
358 showed no significant difference between test and retest correlations ( $p=0.746$ ,  
359 CI(95%) = [-0.004; 0.006], Wilcoxon signed-rank test), therefore we averaged the  
360 correlation of the test and retest conditions resulting in one correlation per participant  
361 per SNR per stimulus. Next, no significant difference was found between the chance  
362 levels of the stimuli ( $p=0.534$ , CI(95%)=[-0.005; 0.003], Wilcoxon signed-rank test). The  
363 95% confidence interval of this non significant difference was similar to the test-retest  
364 variability (CI(95%)=[-0.005; 0.006]), indicating that there is no important decoder  
365 preference towards one of the stimuli.

366 We analyzed neural envelope tracking in the delta (0.5-4 Hz) and the theta (4-8 Hz)  
367 band for the Matrix sentences and the natural story at various levels of speech  
368 intelligibility. Figure 3 shows that when speech intelligibility increases, the correlation  
369 between the acoustic and the reconstructed envelope, i.e. neural envelope tracking,  
370 increases for every filter band and every stimulus tested ( $p<0.001$ , table 1, Spearman  
371 rank correlation).

372 To additionally investigate the influence of stimulus choice, we created an LME model  
373 as a function of speech intelligibility. The analysis shows that neural envelope tracking

374 is enhanced for the natural story compared to the Matrix sentences (fixed effect  
375 stimulus,  $p=0.010$ , LME, table 2). This enhancement does not significantly depend on  
376 the level of speech intelligibility or filter band (interaction effect SI:stimulus,  $p=0.155$ ;  
377 interaction effect SI:band:stimulus,  $p=0.912$ ; LME, table 2). Further, neural envelope  
378 tracking in the delta band (0.5-4 Hz) is higher than in the theta band (4-8 Hz) (fixed  
379 effect band,  $p<0.001$ , LME, table 2) with a steeper slope in the delta band (0.5-4 Hz)  
380 (interaction effect SI:band,  $p<0.001$ , LME, table 2).

381 When conducting the same analysis using SNR as a predictor for speech intelligibility,  
382 the same fixed and interaction effects were found to be significant as for the SI analysis  
383 (table 3). This shows that even at the same SNR neural envelope tracking for the  
384 natural story is enhanced compared to the Matrix sentences, making it impossible to  
385 disentangle between the effects of SNR and SI with the current data.

### 386 **3.3 Temporal response function**

387 The analysis above integrates all different time lags and channels to obtain an optimal  
388 reconstruction of the envelope and requires a decoder trained on a separate story. In  
389 the following analysis we focus on how the neural responses follow the envelope in the  
390 time and spatial domain and remove the assumption that neural processing is similar for  
391 the decoder story and the test stimuli by investigating TRFs. TRFs were calculated on  
392 an individual level. This resulted in 868 TRFs per participant (64 channels x 2 stimuli x  
393 7 SNRs). To visualize topographies, we averaged the TRFs per stimulus per SNR over  
394 participants. To investigate the time-course of the TRFs, we averaged TRFs for a  
395 temporal-occipital channel selection (Figure 4). This selection is based on the TRF

396 results shown in Figure 5. A cluster-based permutation test (Maris and Oostenveld,  
397 2007) shows the TRF samples significantly different from zero, highlighted in bold in  
398 Figure 6.

### 399 3.3.1 Effect of SNR on TRF

400 Figure 5 shows the spatiotemporal activation profile of respectively the Matrix  
401 sentences and the natural story. In the no-noise condition both stimuli show positive  
402 central and negative parieto-occipital amplitudes over time. When a small amount of  
403 noise is added and speech intelligibility remains almost unchanged from the no-noise  
404 condition (SNR=2.5 dB SNR; Matrix sentences: median SI=99.9%, sd=0.2; Natural  
405 story: median SI=99.0%, sd=4.7), the amplitudes across the entire scalp decrease  
406 between 0 to 150 ms, while amplitudes between 150 to 200 ms increase in both stimuli.  
407 Between 50 and 100 ms amplitudes even swap polarities from positive to negative in  
408 the centro-frontal channels (comparing the first 2 rows of the topographies in figure 5).  
409 When more noise is added (rows 3-7, figure 5) and speech intelligibility decreases  
410 positive central and negative parieto-occipital activation decreases, especially in the 150  
411 to 200 ms time lag. In the 50 to 100 ms time lag, on the other hand, the negative central  
412 activation increases with decreasing speech intelligibility and reaches a maximum at  
413 SNR=-3.5 dB SNR.

414 To zoom in on the amplitude changes over time, we visualized an average TRF for the  
415 temporal-occipital channels per SNR in Figure 6. When speech intelligibility is very low  
416 (SNR<-12.5 dB SNR) both stimuli have very low responses over time. With increasing  
417 speech intelligibility, TRF amplitudes also increase gradually. Figure 7 shows the

418 latency and amplitude results of the negative peak that can be found around 100 ms on  
419 a participant level over speech intelligibility. It was determined individually by selecting  
420 the most negative amplitude of the TRF between 50 and 300 ms. With decreasing  
421 speech intelligibility the amplitude of the negative peak per participant decreases for  
422 both stimuli (Matrix sentences: Spearman rank correlation=0.49,  $p < 0.001$ ; Natural story:  
423 Spearman rank correlation=0.26,  $p = 0.005$ ). A centro-frontal channel selection, which is  
424 often used in a clinical setting, reveals similar peaks and significances although with  
425 different polarity (Appendix A). This is in line with the patterns shown on the  
426 topographies in figure 5: Both channel areas are related, the magnitudes vary in the  
427 same way over SNR, but the polarities are swapped.

### 428 3.3.2 Effect of stimulus type on TRF

429 Besides the decreasing amplitude, latency also decreases for the Matrix sentences  
430 with decreasing speech intelligibility (Spearman rank correlation=0.46,  $p < 0.001$ ). For the  
431 natural story, on the other hand, latency is not significantly related to speech  
432 intelligibility (Spearman rank correlation=0.02,  $p = 0.835$ ).

433 Next to the difference between the Matrix sentences and the natural story concerning  
434 latency changes, other stimulus dependent differences can be found. First, a cluster  
435 analysis (Maris and Oostenveld, 2007) over all participants revealed significant  
436 differences ( $\alpha = 0.025$ ) between both stimuli in the no-noise condition with larger  
437 amplitudes for the Matrix sentences in the central and parieto-occipital channels,  
438 highlighted in red in Figure 5. In contrast to this stimuli driven difference in the no-noise  
439 condition, no significant differences between both stimuli could be found in the presence

440 of background noise. Second, in addition to the prominent negative peak between 100  
441 and 200 ms, a positive significant peak arises around 300 ms for the Matrix sentences  
442 at -9.5 dB SNR (Figure 6), while this is not the case for the natural story.

## 443 **4 DISCUSSION**

444 In this study we investigated whether the objective measure of speech intelligibility by  
445 Vanthornhout et al. (2018) using Matrix sentences can also be conducted with natural  
446 speech as this would be beneficial for clinical applications. To that end, we tested 19  
447 normal-hearing participants. They listened to both the Matrix sentences and a natural  
448 story at varying levels of speech intelligibility while their EEG was recorded. We found  
449 that it is feasible to use natural speech as a stimulus for the objective measure of  
450 speech intelligibility and that noise and the stimulus type can change the temporal  
451 characteristics of the brain responses over the scalp.

### 452 **4.1 The same SNR does not result in similar speech intelligibility for different** 453 **stimuli**

454 As a first step we measured speech intelligibility behaviorally for both stimuli at  
455 different noise levels. The results show that the same SNR does not result in similar  
456 speech intelligibility for the different stimuli. The natural story was found to be more  
457 difficult to understand than Matrix sentences. Although we controlled for the sex of the  
458 speaker and chose stimuli with similar speech rates and spectrum, the difference could  
459 still be due to different acoustic features such as for example prosody. The Matrix  
460 sentences namely are part of a standardized speech material where every word is

461 spoken at the same intensity. The natural story, on the other hand, is narrated for  
462 children and has more variations. An additional reason to explain this difference is  
463 lexical prediction. Even though the permutations of the words are different in each  
464 Matrix sentence, the words themselves are all equally likely and familiar to the  
465 participants, in contrast to the natural story. Perhaps drawing from a larger pool of  
466 words for the Matrix sentences might have led to more similar intelligibility ratings  
467 between stimuli. Finally, speech intelligibility for both stimuli was measured in a different  
468 way: rating (natural story) versus recall (Matrix sentences). Similar to the very small and  
469 insignificant difference of 0.5 dB between rate and recall of Matrix sentences reported  
470 by Decruy et al. (2018), we did not find any statistical difference either between both  
471 measuring methods applied on the same Matrix sentences.

472 Besides the difference between the Matrix sentences and the natural story per  
473 participant, the variability between participants is also different per stimulus. Variability  
474 is high for the natural story compared to the matrix sentences (figure 2). This difference  
475 could be explained by the fact that the Matrix sentences are a validated speech material  
476 created with the intention to have very low inter-subject variability to only reflect hearing  
477 performance independent of other individual skills. The natural story, on the other hand,  
478 is not controlled for this and is more dependent on individual skills such as for example  
479 linguistic knowledge, cognition and attention span.

## 480 **4.2 Neural envelope tracking as an objective measure of speech intelligibility**

481 We found that the correlation between the reconstructed and the acoustic envelope  
482 increased with speech intelligibility for both the Matrix sentences and the natural story.

483 This supports the results of Luo and Poeppel (2007); Ding and Simon (2013); Ding et al.  
484 (2014); Molinaro and Lizarazu (2017); Vanthornhout et al. (2018) where an increase in  
485 speech intelligibility was also found to accompany an increase in envelope tracking and  
486 demonstrates that the objective measure of speech intelligibility using Matrix sentences  
487 by Vanthornhout et al. (2018) can be conducted with fully natural speech.

488 Next, the tracking results in the delta band were significantly higher than in the theta  
489 band while the significance levels remain the same, resulting in a steeper slope of  
490 envelope tracking as a function of speech intelligibility in the delta band. This difference  
491 in correlation magnitude between the frequency bands could be explained by the fact  
492 that the modulation spectrum of both stimuli has most energy in the delta band (Luo and  
493 Poeppel, 2007; Aiken and Picton, 2008).

494 When investigating the differences between both stimuli, we found that the use of  
495 natural speech enhanced neural envelope tracking compared to Matrix sentences. This  
496 suggests that neural envelope tracking might capture the interaction between the  
497 incoming acoustic speech stream and top-down information (Hickok and Poeppel, 2007;  
498 Gross et al., 2013) such as for example semantic processing (Di Liberto et al., 2018;  
499 Broderick et al., 2018). A potential confound is that we used different SNRs for the two  
500 stimulus types (to control for intelligibility). This means that the differences in envelope  
501 tracking could be related simply to SNR rather than other stimulus properties. To  
502 investigate this, we conducted the same analysis, but with SNR as predictor instead of  
503 intelligibility, and again found significantly increased envelope tracking for the natural  
504 story stimulus. This shows that SNR by itself does not account for the full difference



505 between the two stimulus types. A remarkable finding arising from this SNR analysis, is  
506 that neural envelope tracking at a particular SNR is higher for the natural story  
507 compared to the Matrix sentences, although SI is lower. This seems in contrast with the  
508 hypothesis that neural envelope tracking relates to SI. We hypothesize that this  
509 increase is present because the story stimulus elicits more brain activity (e.g., semantic  
510 processing and working memory). This underlines the importance of always selecting 1  
511 stimulus to investigate SI to eliminate inter-stimulus differences.

512 In addition, other confounding factors besides SNR could also be present. First,  
513 although the acoustics of the stimuli were matched in terms of sex and speech rate of  
514 the speaker and spectrum of the stimulus, acoustic differences like prosody are still  
515 present, as discussed in section 4.1. Second, despite the questions asked to motivate  
516 the participants, the reduced correlations for the Matrix sentences could be linked to  
517 attention. Because listening to concatenated sentences can be boring, attention loss  
518 could occur which reduces neural envelope tracking (Ding and Simon, 2012; Kong et  
519 al., 2014; Petersen et al., 2017; Vanthornhout et al., 2019). For the natural story, on the  
520 other hand, attention could be less of an issue as attending this speech is entertaining  
521 possibly resulting in higher correlations.

### 522 **4.3 The effect of noise and stimulus type on neural envelope tracking**

523 In addition to envelope reconstruction to show the feasibility of natural speech as a  
524 stimulus for the objective measure (4.2), we conducted a TRF analysis. This analysis  
525 enables us to investigate the temporal characteristics of the brain responses over the  
526 entire scalp and removes the assumption that neural processing is similar for the

527 decoder story and the test stimuli. The topographies in Figure 5 of both stimuli show a  
528 negative activation in the temporal-occipital channels and positive activation in the  
529 central channels. This is a typical topography of auditory evoked far-field potentials  
530 (Picton, 2011). The large negative peak within the 100 to 200 ms time lag (Figure 6)  
531 could be related to the N100, usually occurring at a latency between 70-150 ms (Picton,  
532 2011).

#### 533 4.3.1 Effect of SNR and speech intelligibility on TRFs

534 Generally we found, similar to envelope reconstruction, high TRF amplitudes over the  
535 entire scalp when speech intelligibility is high (SI=100%) and reduced amplitudes when  
536 speech intelligibility decreased for both stimuli, again showing feasibility of natural  
537 speech as a stimulus for the objective measure of speech intelligibility. Most remarkable  
538 are the TRF amplitudes between 150 to 200 ms, which consistently decrease with  
539 decreasing speech intelligibility, perhaps indicating a time window sensitive to speech  
540 intelligibility. This amplitude decrease is similar to the behavior of the N1-P2 complex in  
541 function of SNR for tone- or syllable-induced event related potentials (ERPs) (Whiting et  
542 al., 1998; Billings et al., 2009). Another peculiarity are the noise induced topographic  
543 changes. When a small amount of noise is added and speech intelligibility remains  
544 almost unchanged from the no-noise condition (SNR=2.5 dB SNR; Matrix sentences:  
545 SI=99.9%; Natural story: SI=99.0%), TRF amplitudes across the entire scalp decrease  
546 between 0 to 150 ms, while amplitudes between 150 to 200 ms increase. Moreover,  
547 TRF amplitudes between 50 and 100 ms even switch polarities in the presence of noise.  
548 These increases in amplitudes could potentially be linked to enhanced top-down  
549 attention when listening to speech in noise (Fritz et al., 2007). Top-down attention is a

550 selection process that steers neural focusing resources to the desired information  
551 stream (the clean speech in this case). This active top-down process causes changes in  
552 TRF amplitudes between 50 and 200 ms (Ding and Simon, 2012; Kong et al., 2014;  
553 Petersen et al., 2017; Vanthornhout et al., 2019). An additional remark about these  
554 noise induced TRF changes concerns the decoder used for envelope reconstruction.  
555 Although a decoder trained on clean speech is able to reconstruct the envelope of  
556 speech surrounded by noise reliably, it could be more optimal to train the decoder on  
557 speech in noise.

#### 558 4.3.2 Effect of stimulus type on TRFs

559 Stimulus related differences can be found when comparing topography results  
560 between both stimuli. TRF amplitudes are larger for the Matrix sentences in the central  
561 and parieto-occipital channels compared to the natural story in the no-noise condition.  
562 In the presence of background noise, even at a very high SNR, no significant difference  
563 can be found anymore. A possible hypothesis could be the interaction between the  
564 incoming acoustic speech stream and top-down information (Hickok and Poeppel, 2007;  
565 Gross et al., 2013): In the no-noise condition Matrix sentences are mainly processed in  
566 a feed-forward acoustical way. The enhanced TRF amplitudes could be caused by the  
567 fixed syntactical 5-word structure of the Matrix sentences, resulting in a more rigid word  
568 and sentence rate compared to the natural story. However, when noise is added, more  
569 effort has to be paid to listen to the Matrix sentences (Wu et al., 2016; Houben et al.,  
570 2013). This changes listening to the Matrix sentences from a bottom-up process to an  
571 interactive bottom-up and top-down process similar to the natural story, diminishing the  
572 differences between both stimuli.

573 Another stimulus related difference is the latency pattern over speech intelligibility.  
574 The latency of the negative peak decreases with increasing speech intelligibility for the  
575 Matrix sentences, while the latency remains unchanged for the natural story. A latency  
576 decrease of N100 with increasing speech intelligibility, similar to the Matrix sentences,  
577 has been reported in literature analyzing speech- (Petersen et al., 2017; Kong et al.,  
578 2014), tone- (Billings et al., 2009) and syllable-induced ERPs (Whiting et al., 1998;  
579 Kaplan-Neeman et al., 2006, but is not supported for TRFs for continuous speech by  
580 Ding and Simon (2012). This different pattern between the Matrix sentences and the  
581 natural story could be explained by two factors. (1) Top-down processing: This is  
582 present for the natural story the entire time, for the Matrix sentences, on the other hand,  
583 it increases with increasing noise level. Top-down processing requires more time, which  
584 could result in delayed TRFs. (2) Attention: Listening to concatenated Matrix sentences  
585 might be boring, especially when speech intelligibility decreases, which could result in  
586 attention loss and less listening effort known to delay neural processing of speech (Ding  
587 and Simon, 2012; Kong et al., 2014; Petersen et al., 2017; Vanthornhout et al., 2019).

588 A last result to point out is the positive peak around 300 ms for the Matrix sentences  
589 at -9.5 dB SNR (SI=49%) (Figure 6). In ERPs a positive peak around this time lag is  
590 known to occur when a participant tries to detect a target stimulus (Picton, 1992, 2011).  
591 As the Matrix sentences do not contain semantic context, which makes content  
592 questions not possible, counting questions were asked at every SNR trial, for example,  
593 'Which colors of boats were mentioned?'. We hypothesize that the question type,  
594 content questions for the natural story versus counting questions for the Matrix  
595 sentences, accounts for this difference around 300ms. As a consequence, the type of

596 questions to ask is also an important factor to take into account for future research.

#### 597 **4.4 Implications for applied research and potential clinical applications**

598 In this study we showed that the objective measure of speech intelligibility by  
599 Vanthornhout et al. (2018) using Matrix sentences can also be conducted with natural  
600 speech as a stimulus. Although neural tracking is enhanced using natural speech  
601 instead of Matrix sentences, no significant differences in slope of neural tracking in  
602 function of speech intelligibility are found. Therefore both stimuli are equally appropriate  
603 to calculate the objective measure of speech intelligibility. The stimulus choice will have  
604 to be considered based on the intended purpose of the measurement. For clinical  
605 applications, for example, we should distinguish between applications in hearing aid  
606 fitting and in general diagnostics of the auditory system. For hearing aid fitting, mainly  
607 the peripheral processing of speech is of interest, so any type of natural speech is  
608 appropriate. For diagnostics, a potential added benefit of a story is that it is closer to  
609 everyday communication, and may relate better with subjective experience.

610 Before clinical application, however, several optimization and validation steps still  
611 need to be undertaken: How can we reduce measuring time? How is test-retest  
612 reliability within a subject over several test sessions? Also the optimal way of measuring  
613 envelope tracking (decoder versus TRF) should be considered. Decoders are probably  
614 better suited for clinical applications and TRFs for research. A decoder does not require  
615 any channel selection or peak-picking, making it easy to use and interpret the results.  
616 TRFs, on the other hand, reveal much more information which is useful for research  
617 purposes, but less in the clinical field: Interpreting TRFs is time-consuming and can only

618 be done by highly trained personnel. A concern, however, when using decoders in the  
619 clinic, is that subject-specific decoders require long measurement times. A solution  
620 would be a generic decoder model which has already been shown to be successful (Di  
621 Liberto and Lalor, 2017) and to not decrease performance (Lesenfants et al., 2019b).

#### 622 **4.5 Limitations of this study**

623 Frequently recurring confounds throughout the discussion of this study are the attention  
624 paid by the listener and listening effort. We tried to control for this by asking the  
625 participants to focus and present them content questions after every trial. However, we  
626 cannot be sure they always paid attention. In future research it could be useful to also  
627 measure attention and listening effort using, e.g., pupillometry (Ohlenforst et al., 2017)  
628 or alpha power (Miles et al., 2017; Dimitrijevic et al., 2019). In addition, for the natural  
629 story, the order of presented SNRs could also have influenced the results. If, e.g., the  
630 higher noise levels were presented first, given that comprehension at the -12.5 SNR  
631 level is basically zero, the participant could lose the story line and have worse results in  
632 further trials compared to someone who listened to the easier noise levels in the  
633 beginning. To minimize this possible bias, we presented all SNRs in random order per  
634 participant and the first part of the natural story was always presented in quiet. A third  
635 limitation is that the presented Matrix sentences were repeated twice, while the natural  
636 story was not. However, we believe this was not a major confound as the Matrix  
637 sentences consist of a random combination of 5 word categories which make them very  
638 hard to remember. Finally, we rereferenced our data to a common average of the  
639 channels to not bias topography patterns relative to the chosen channel. A potential

640 disadvantage of this approach is that the absolute TRF polarity is more difficult to  
641 interpret and to compare with previous studies using for example Cz- or mastoid  
642 rereferencing. This is, however, not a major concern in this study because we are  
643 interested in how TRF polarities and magnitudes of different conditions relate to each  
644 other and not to an absolute number.

#### 645 **4.6 Conclusion**

646 We found increasing neural envelope tracking with increasing speech intelligibility for  
647 both stimuli with an additional enhancement for natural speech compared to Matrix  
648 sentences. These results show (1) the feasibility of natural speech as a stimulus for the  
649 objective measure of speech intelligibility, (2) that neural envelope tracking is enhanced  
650 using a story compared to Matrix sentences and (3) that noise and the stimulus type  
651 can change the temporal characteristics of the brain responses.

## 652 **Acknowledgements**

653 The authors would like to thank Lien Decruy and Elien Vanluydt for their help in data  
654 acquisition. All authors designed the experiment, contributed to the data analysis,  
655 discussed the results and implications and commented on the manuscript at all stages.  
656 E.V. performed the experiments and wrote the paper. This project has received funding  
657 from the European Research Council (ERC) under the European Union's Horizon 2020  
658 research and innovation programme (grant agreement No 637424 to Tom Francart).  
659 Further support came from KU Leuven Special Research Fund under grant OT/14/119.  
660 Research of Jonas Vanthornhout (1S10416N) and Eline Verschueren (1S86118N) is  
661 funded by a PhD grant of the Research Foundation Flanders (FWO). The authors  
662 declare no conflict of interest.

## 663 **REFERENCES**

- 664 Aiken, S. J. and Picton, T. W. (2008). Human Cortical Responses to the Speech  
665 Envelope. *Ear & Hearing*, 29, 139–157.
- 666 Anderson, A. J., Broderick, M. P., and Lalor, E. C. (2018). Neuroscience: Great  
667 Expectations at the Speech–Language Interface. *Current Biology*, 28, 1396–1398.  
668 doi:10.1016/j.cub.2018.10.063
- 669 Biesmans, W., Das, N., Francart, T., and Bertrand, A. (2017). Auditory-inspired speech  
670 envelope extraction methods for improved EEG-based auditory attention detection in a  
671 cocktail party scenario. *IEEE Transactions on Neural Systems and Rehabilitation*



672 *Engineering*, 25, 402–412. doi:10.1109/TNSRE.2016.2571900

673 Billings, C.J., Tremblay, K.L., Stecker, G.C. and Tolin, W.M. (2009). Human evoked  
674 cortical activity to signal-to-noise ratio and absolute signal level. *Hearing Research*, 254,  
675 15-24. doi:10.1016/j.heares.2009.04.002

676 Brodbeck, C. (2017). Eelbrain: 0.25. Zenodo. doi:10.5281/zenodo.1186450

677 Brodbeck, C., Presacco, A., and Simon, J. Z. (2018). Neural source dynamics of brain  
678 responses to continuous stimuli: Speech processing from acoustics to comprehension.  
679 *NeuroImage*, 172, 162–174. doi:10.1016/j.neuroimage.2018.01.042

680 Broderick, M. P., Anderson, A. J., Liberto, G. M. D., et al. (2018). Electrophysiological  
681 correlates of semantic dissimilarity reflect the comprehension of natural , narrative  
682 speech. *Current Biology*, 28, 803–809.

683 David, S. V., Mesgarani, N., and Shamma, S. A. (2007). Estimating sparse spectro-  
684 temporal receptive fields with natural stimuli. *Network: Computation in Neural Systems*,  
685 18, 191–212. doi:10.1080/09548980701609235

686 Decruey, L., Das, N., Verschueren, E., and Francart, T. (2018). The self-assessed Bekey  
687 procedure: validation of a method to measure intelligibility of connected discourse.  
688 *Trends in Hearing*, 22, 1–13. doi:10.1177/2331216518802702

689 Di Liberto, G. M. and Lalor, E. C. (2017). Indexing cortical entrainment to natural speech  
690 at the phonemic level: Methodological considerations for applied research. *Hearing  
691 research*, 348, 70-77. doi:10.1016/j.heares.2017.02.015

692 Di Liberto, G. M., Lalor, E. C., and Millman, R. E. (2018). Causal cortical dynamics of a  
693 predictive enhancement of speech intelligibility. *NeuroImage*, 166, 247–258.  
694 doi:10.1016/j.neuroimage.2017.10.066

695 Dimitrijevic, A., Smith, M.L., Kadis, D.S., & Moore, D.R. (2019) Neural indices of listening  
696 effort in noisy environments. *Scientific Reports*, 9, 1–10.

697 Ding, N., Chatterjee, M., and Simon, J. Z. (2014). Robust cortical entrainment to the  
698 speech envelope relies on the spectro-temporal fine structure. *NeuroImage*, 88, 41–46.  
699 doi:10.1016/j.neuroimage.2013.10.054

700 Ding, N. and Simon, J. Z. (2011). Neural coding of continuous speech in auditory cortex  
701 during monaural and dichotic listening. *Journal of Neurophysiology*, 107, 78–89.  
702 doi:10.1152/jn.00297.2011

703 Ding, N. and Simon, J. Z. (2012). Emergence of neural encoding of auditory objects while  
704 listening to competing speakers. *Proceedings of the National Academy of Sciences of*  
705 *the United States of America*, 109, 11854–9. doi:10.1073/pnas.1205381109

706 Ding, N. and Simon, J. Z. (2013). Adaptive Temporal Encoding Leads to a Background-  
707 Insensitive Cortical Representation of Speech. *Journal of Neuroscience*, 33, 5728–  
708 5735. doi:10.1523/JNEUROSCI.5297-12.2013

709 Francart, T., van Wieringen, A., and Wouters, J. (2008). APEX 3: a multi-purpose test  
710 platform for auditory psychophysical experiments. *Journal of Neuroscience Methods*,  
711 172, 283–293. doi:10.1016/j.jneumeth.2008.04.020

712 Fritz, J. B., Elhilali, M., David, S. V., and Shamma, S. A. (2007). Auditory attention—  
713 focusing the searchlight on sound. *Curr. Opin. Neurobiol.*, 17, 437–455.  
714 doi:10.1016/j.conb.2007.07.011

715 Gross, J., Hoogenboom, N., Thut, G., et al. (2013). Speech rhythms and multiplexed  
716 oscillatory sensory coding in the human brain. *PLoS biology*, 11, e1001752.  
717 doi:10.1371/journal.pbio.1001752

718 Hickok, G. and Poeppel, D. (2007). The cortical organization of speech processing.  
719 *Nature reviews. Neuroscience*, 8, 393–402. doi:10.1038/nrn2113

720 Houben, R., van Doorn-Bierman, M. and Dreschler, W.A. (2013). Using response time to  
721 speech as a measure for listening effort, *International Journal of Audiology*, 52:11, 753-  
722 761. doi:10.3109/14992027.2013.832415

723 Kaplan-Neeman, R., Kishon-Rabin, L., Henkin, Y., Muchnik, C. (2006). Identification of  
724 syllables in noise: electrophysiological and behavioral correlates. *J. Acoust. Soc. Am.*,  
725 120 (2), 926–933.

726 Kerlin, J. R., Shahin, A. J., and Miller, L. M. (2010). Attentional gain control of ongoing  
727 cortical speech representations in a "cocktail party". *The Journal of neuroscience : the*  
728 *official journal of the Society for Neuroscience*, 30, 620–8. doi:10.1523/JNEURO  
729 SCI.3631-09.2010

730 Kong, Y.-Y., Mullangi, A., and Ding, N. (2014). Differential modulation of auditory  
731 responses to attended and unattended speech in different listening conditions. *Hearing*

- 732 *Research*, 0, 73–81. doi:10.1002/ana.22528. Toll-like
- 733 Lalor, E. C., Pearlmutter, B. A., Reilly, R. B., et al. (2006). The VESPA: A method for the  
734 rapid estimation of a visual evoked potential. *NeuroImage*, 32, 1549–1561.  
735 doi:10.1016/j.neuroimage.2006.05.054
- 736 Lalor, E. C., Power, A. J., Reilly, R. B., and Foxe, J. J. (2009). Resolving Precise  
737 Temporal Processing Properties of the Auditory System Using Continuous Stimuli.  
738 *Journal of Neurophysiology*, 102, 349–359. doi:10.1152/jn.90896.2008
- 739 Lesenfants, D., Vanthornhout, J., Verschueren, E., et al. (2019a). Predicting individual  
740 speech intelligibility from the neural tracking of acoustic- and phonetic-level speech  
741 representations. *Hearing Research*, 380, 1-9. doi:10.1016/j.heares.2019.05.006
- 742 Lesenfants, D., Vanthornhout, J., Verschueren, E. and Francart, T. (2019b). Data-driven  
743 spatial filtering for improved measurement of cortical tracking of multiple representations  
744 of speech. *Journal of neural engineering*, 16(6):066017. doi:10.1088/1741-2552/ab3c92
- 745 Luo, H. and Poeppel, D. (2007). Phase patterns of neuronal responses reliably  
746 discriminate speech in human auditory cortex. *Neuron*, 54, 1001–10.  
747 doi:10.1016/j.neuron.2007.06.004
- 748 Maris, E. and Oostenveld, R. (2007). Nonparametric statistical testing of EEG- and MEG-  
749 data. *Journal of Neuroscience Methods*, 164, 177–190.  
750 doi:10.1016/j.jneumeth.2007.03.024
- 751 Mesgarani, N. and Chang, E. F. (2012). Selective cortical representation of attended

752 speaker in multi-talker speech perception. *Nature*, 485, 233–6.  
753 doi:10.1038/nature11020

754 Miles, K., McMahon, C., Boisvert, I., Ibrahim, R., Lissa, P. de, Graham, P., & Lyxell, B.  
755 (2017). Objective Assessment of Listening Effort: Coregistration of Pupillometry and  
756 EEG. *Trends in hearing*, 21, 1–13.

757 Molinaro, N. and Lizarazu, M. (2017). Delta(but not theta)-band cortical entrainment  
758 involves speech-specific processing. *European Journal of Neuroscience*, 9, 1–9.  
759 doi:10.1111/ejn.13811

760 Obleser, J. and Kotz, S. A. (2011). Multiple brain signatures of integration in the  
761 comprehension of degraded speech. *NeuroImage*, 55, 713–723.  
762 doi:10.1016/j.neuroimage.2010.12.020

763 Ohlenforst, B., Zekveld, A.A., Lunner, T., Wendt, D., Naylor, G., Wang, Y., Versfeld, N.J.,  
764 & Kramer, S.E. (2017). Impact of stimulus-related factors and hearing impairment on  
765 listening effort as indicated by pupil dilation. *Hearing Research*, 351, 68–79.

766 Pernet, C. R., Wilcox, R. and Rousselet, G. A. (2012). Robust Correlation Analyses:  
767 False Positive and Power Validation Using a New Open Source Matlab Toolbox. *Front*  
768 *Psychol.*, 3:606. doi: 10.3389/fpsyg.2012.00606.

769 Petersen, E. B., Wostmann, M., Obleser, J., and Lunner, T. (2017). Neural tracking of  
770 attended versus ignored speech is differentially affected by hearing loss. *Journal of*  
771 *Neurophysiology*, 117, 18–27. doi:10.1152/jn.00527.2016

- 772 Picton, T. W. (1992). The P300 Wave of the Human Event-Related Potential. *Journal of*  
773 *clinical Neurophysiology*, 9, 456–479
- 774 Picton, T. W. (2011). *Human Auditory Evoked Potentials* (San Diego: Plural Publishing  
775 inc.)
- 776 Shannon, R. V., Zeng, F.-G., Kamath, V., et al. (1995). Speech Recognition with Primarily  
777 Temporal Cues. *Science*, 270, 303–304. doi:10.1126/science.270.5234.303
- 778 Somers, B., Francart, T., and Bertrand, A. (2018). A generic EEG artifact removal  
779 algorithm based on the multi-channel Wiener filter. *Journal of neural engineering*, 15.  
780 doi:10.1088/1741-2552/aaac92
- 781 Vanthornhout, J., Decruy, L., and Francart, T. (2019). Effect of task and attention on  
782 neural tracking of speech. *Frontiers in Neuroscience*, 13, 977.  
783 doi:10.3389/fnins.2019.00977
- 784 Vanthornhout, J., Decruy, L., Wouters, J., and Francart, T. (2018). Speech intelligibility  
785 predicted from neural entrainment of the speech envelope. *JARO*, 19, 181–191.  
786 doi:10.1007/s10162-018-0654-z
- 787 Whiting, K.A., Martin, B.A., Stapells, D.R. (1998). The effects of broad-band noise  
788 masking on cortical event-related potentials to speech sounds /ba/ and /da. *Ear &*  
789 *Hearing*, 19 (3), 218–231.
- 790 Wu, Y.H., Stangl, E., Zhang, X., Perkins, J., & Eilers, E. (2016). Psychometric Functions  
791 of Dual-Task Paradigms for Measuring Listening Effort. *Ear & Hearing*, 37, 660–670.

## 792 **Figure legends**

793 **Figure 1.** Overview of the experimental setup using the linear decoder analysis. We  
794 presented the Matrix sentences and a natural story at different Signal-to-Noise Ratio's  
795 (SNR). Participants listened to the speech while their EEG was measured. To obtain a  
796 measure of neural envelope tracking we correlated the reconstructed envelope with the  
797 acoustic envelope after band-pass filtering (BP filter). We compared the envelope  
798 tracking results with the behavioral speech intelligibility (SI) scores.

799 **Figure 2.** A comparison between the Matrix sentences and the natural story reveals that  
800 the story is more difficult to understand when adding background noise.

801 **Figure 3.** Neural envelope tracking increases with increasing speech intelligibility and  
802 by using natural speech as a stimulus. The shading represents two times the standard  
803 error of the fit and the dotted line is the significance level of the correlation ( $\pm 0.019$ ).

804 **Figure 4.** Electrode selection: 64 active electrodes placed according to the 10-20  
805 electrode system. The locations of the electrodes that were selected for the calculation  
806 of the occipital-temporal TRF are indicated in red.

807 **Figure 5.** Topographies for the natural story and the Matrix sentences at different SNRs  
808 and different time lags varying from 0 until 200 ms. Significant differences between the  
809 Matrix sentences and the natural story are highlighted in red.

810 **Figure 6.** Time-course of the temporal-occipital TRFs over participants for the Matrix

811 sentences and the natural story. TRF samples significantly different from zero are  
812 highlighted in bold.

813 **Figure 7.** Latency and amplitude of the negative peak of the temporal-occipital TRF  
814 between 50 and 300 ms per participant over speech intelligibility.



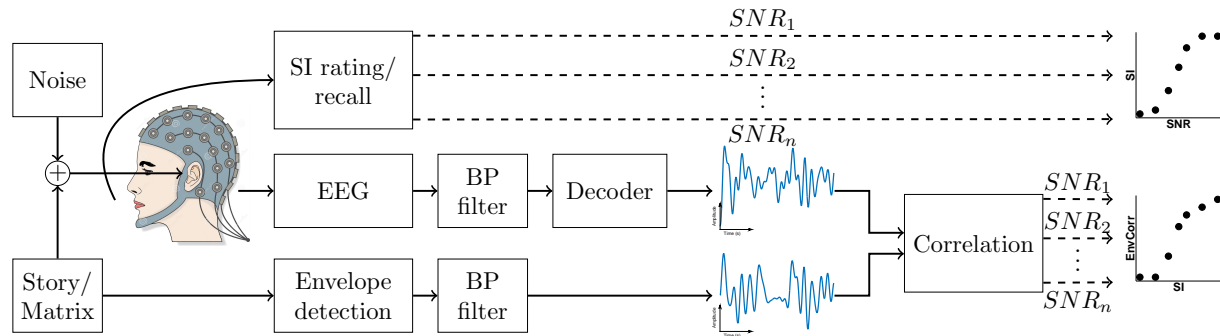

**Figure 1.** Overview of the experimental setup using the linear decoder analysis. We presented the Matrix sentences and a story at different Signal-to-Noise Ratio's (SNR). Participants listened to the speech while their EEG was measured. To obtain a measure of neural envelope tracking we correlated the reconstructed envelope with the acoustic envelope after band-pass filtering (BP filter). We compared the envelope tracking results with the behavioral speech intelligibility (SI) scores.

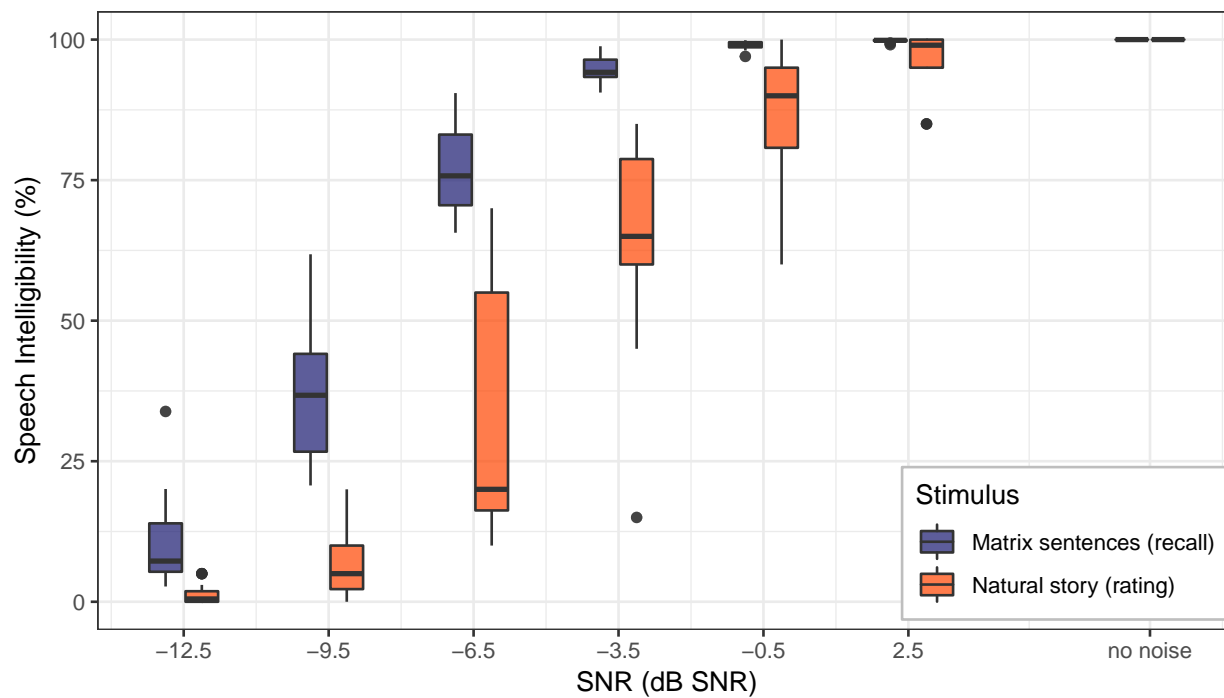

**Figure 2.** A comparison between the Matrix sentences and the story reveals that the story is more difficult to understand when adding background noise.

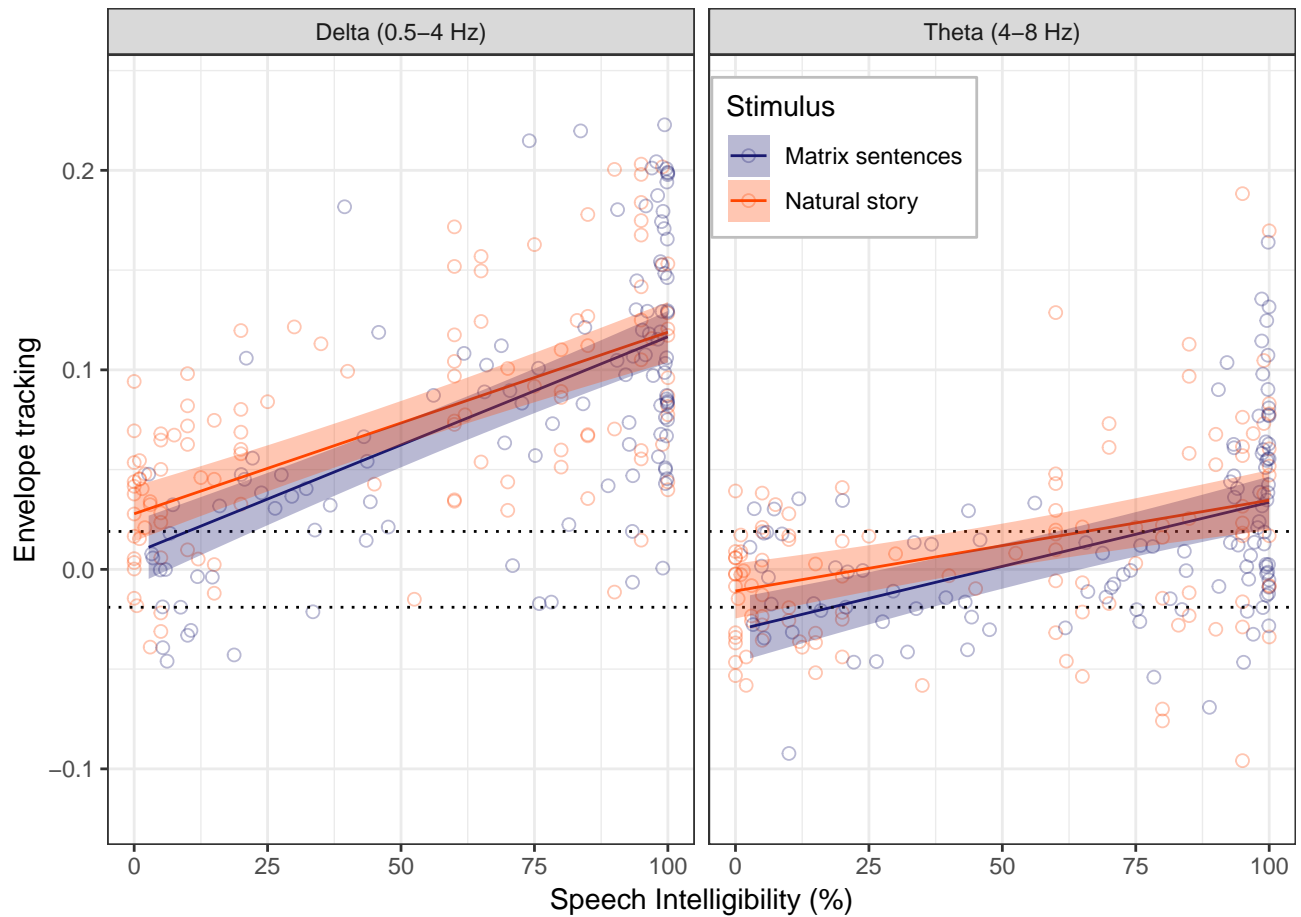

**Figure 3.** Neural envelope tracking increases with increasing speech intelligibility and by using natural speech as a stimulus. The shading represents two times the standard error of the fit and the dotted line is the significance level of the correlation ( $\pm 0.019$ ).

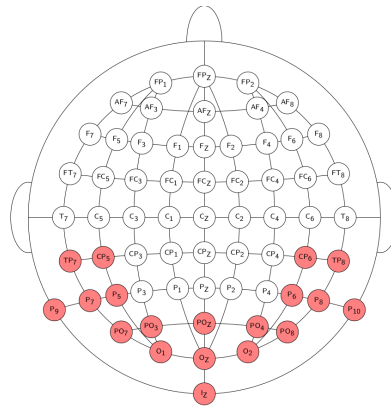

**Figure 4.** Electrode selection: 64 active electrodes placed according to the 10-20 electrode system. The locations of the electrodes that were selected for the calculation of the occipital-temporal TRF are indicated in red.

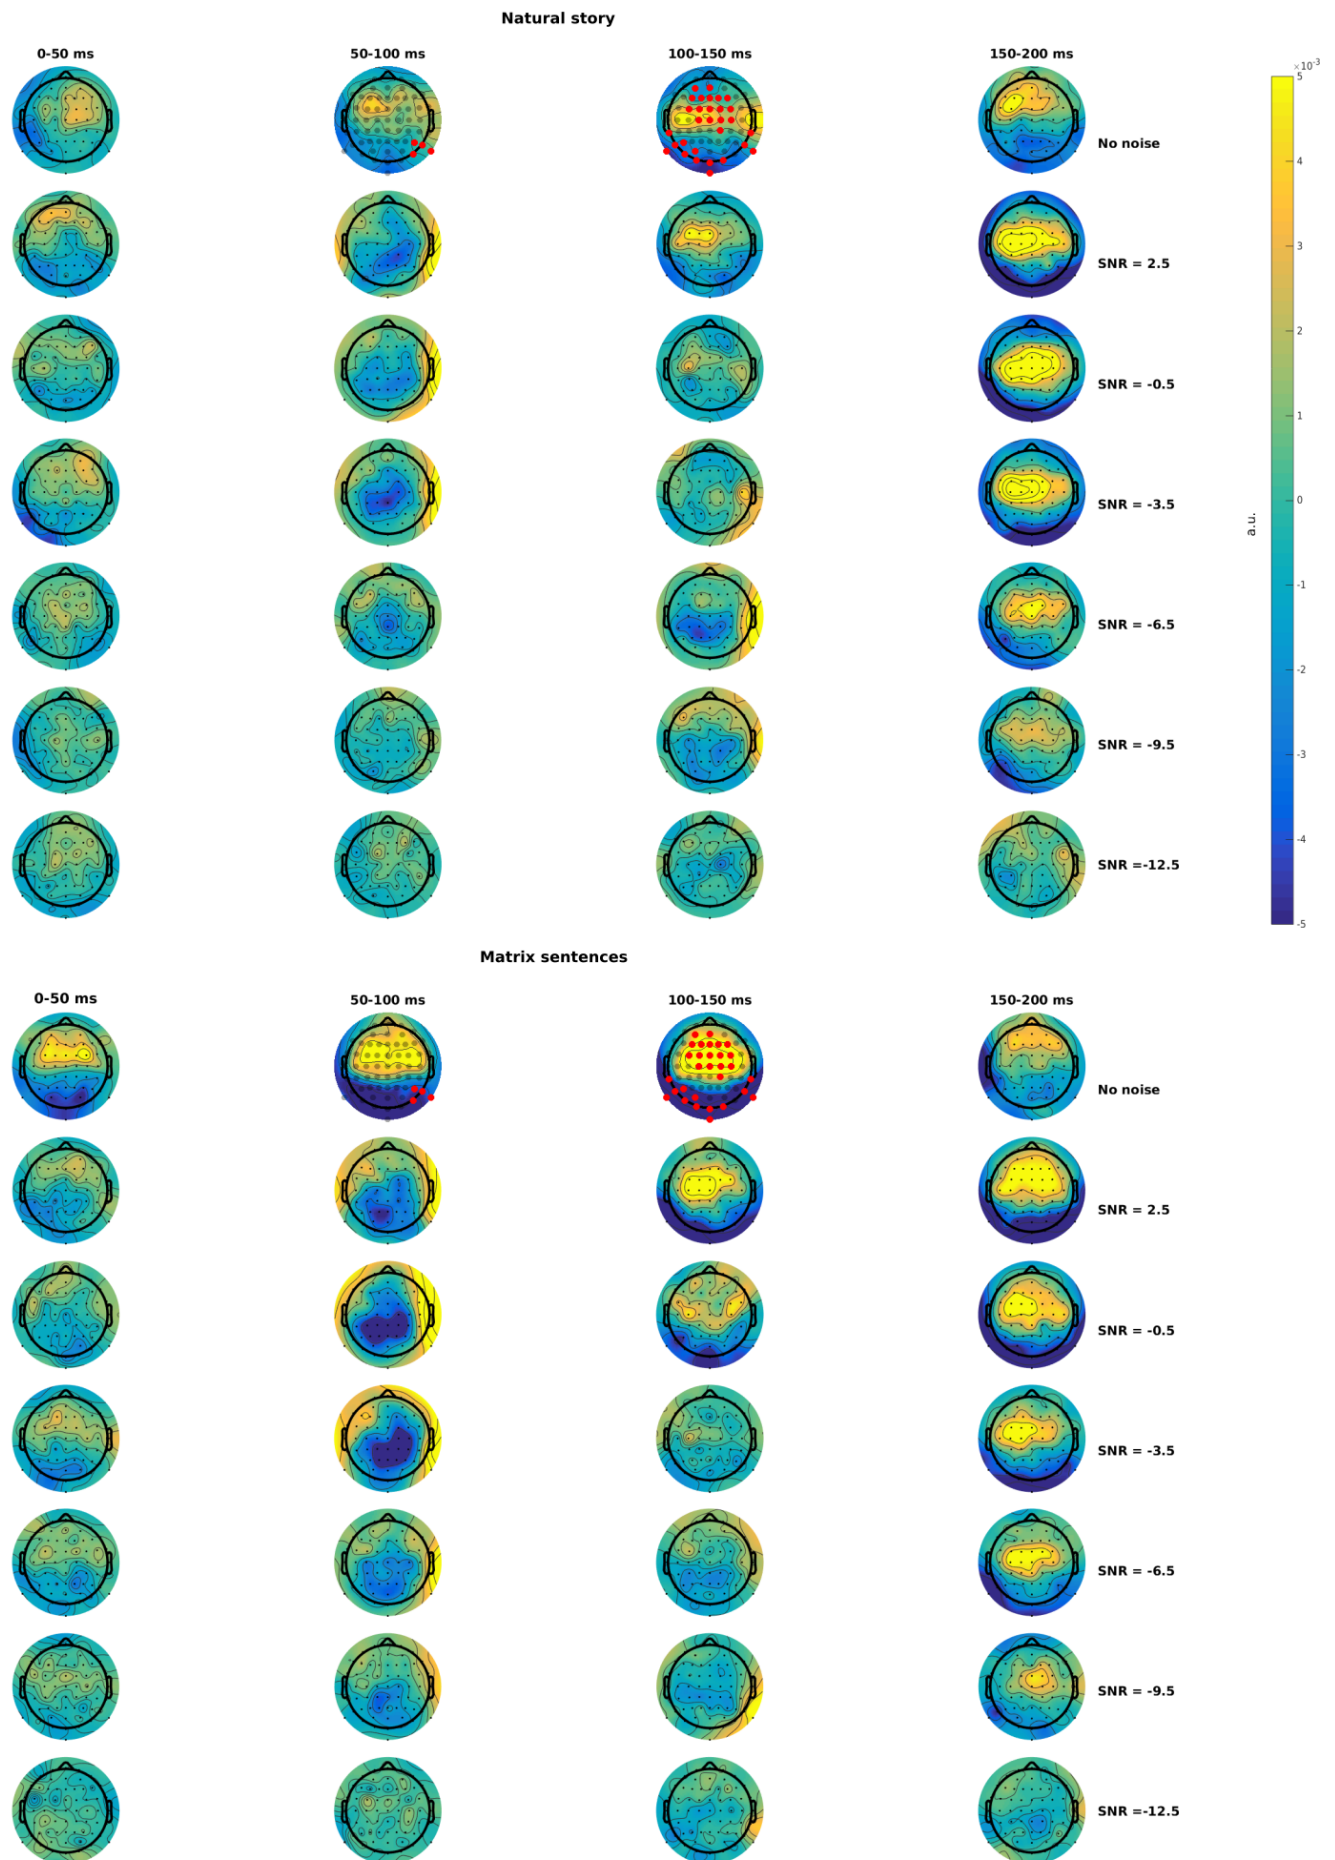

**Figure 5.** Topographies for the story and the Matrix sentences at different SNRs and different time lags varying from 0 until 200 ms. Significant differences between the Matrix sentences and the story are highlighted in red.

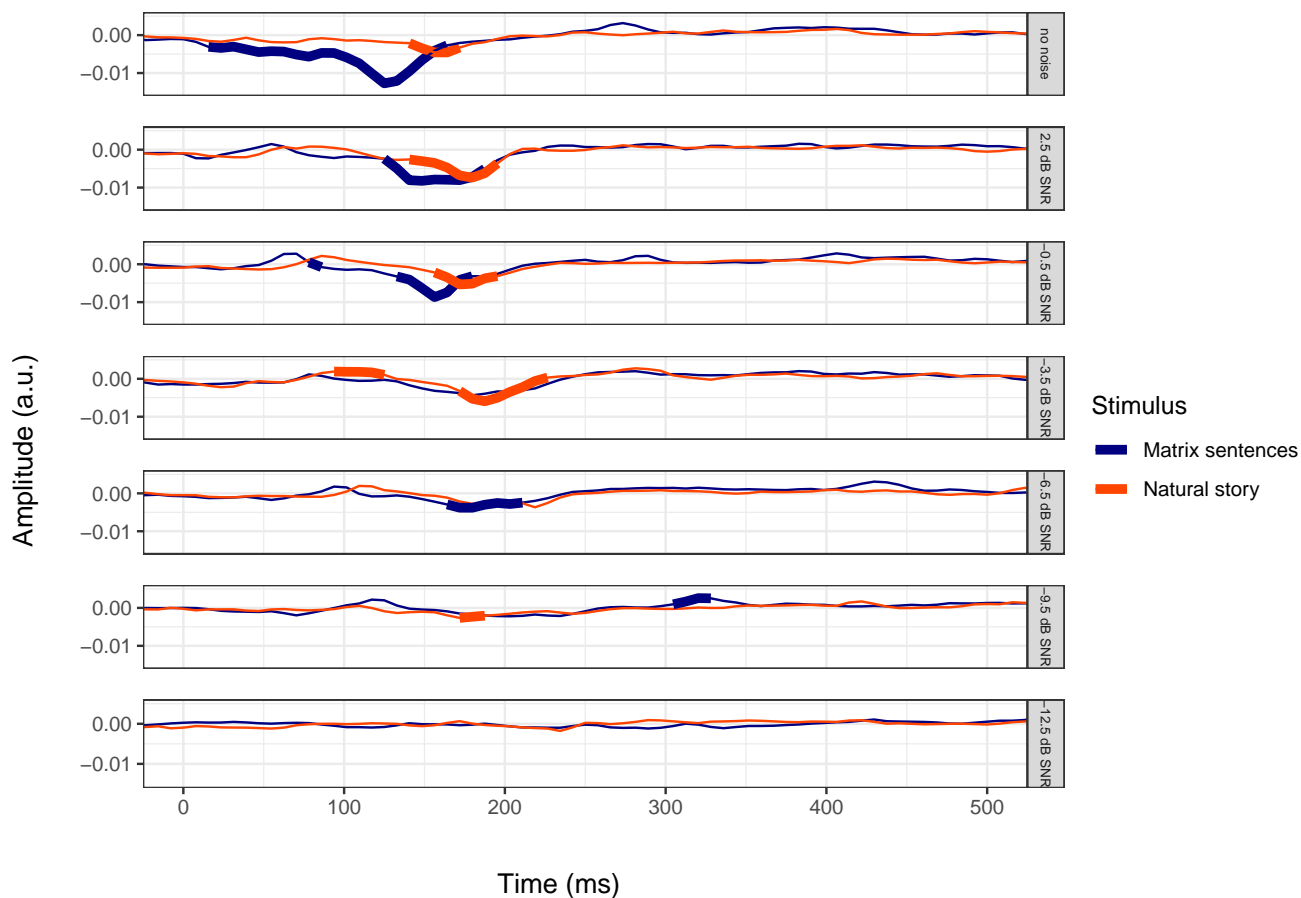

**Figure 6.** Time-course of the temporal-occipital TRFs over participants for the Matrix sentences and the story. TRF samples significantly different from zero are highlighted in bold.

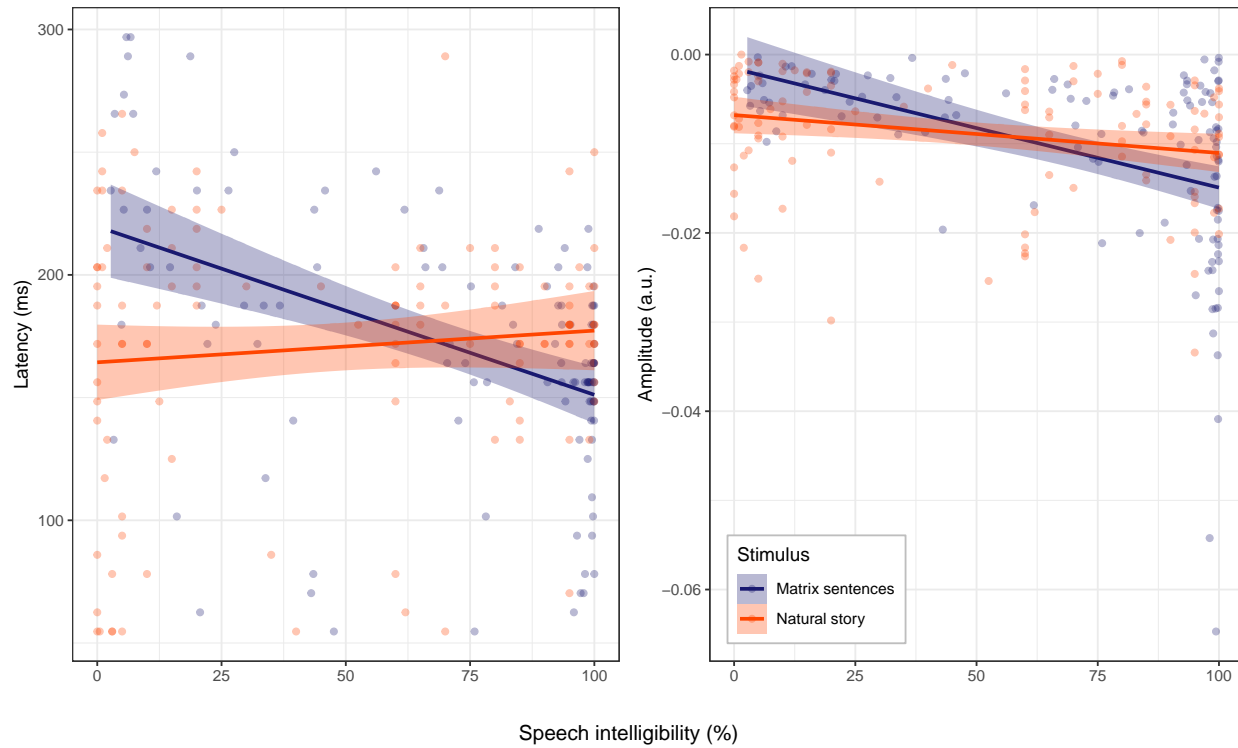

**Figure 7.** Latency and amplitude of the negative peak of the temporal-occipital TRF between 50 and 300 ms per participant over speech intelligibility.

**Table 1.** Spearman rank correlation between neural envelope tracking and speech understanding

| Stimulus         | Filter band      | Correlation | p-value |
|------------------|------------------|-------------|---------|
| Matrix sentences | Delta (0.5-4 Hz) | 0.62        | p<0.001 |
| Natural story    | Delta (0.5-4 Hz) | 0.59        | p<0.001 |
| Matrix sentences | Theta (4-8 Hz)   | 0.46        | p<0.001 |
| Natural story    | Theta (4-8 Hz)   | 0.41        | p<0.001 |



**Table 2.** Linear Mixed Effect Model of envelope reconstruction in function of SI

| Linear mixed effect model (factor)  | beta value             | CI(95%)                   | p-value     |
|-------------------------------------|------------------------|---------------------------|-------------|
| Fixed effect SI                     | $1.08 \times 10^{-3}$  | $\pm 1.90 \times 10^{-4}$ | $p < 0.001$ |
| Fixed effect stimulus               | $1.97 \times 10^{-2}$  | $\pm 1.49 \times 10^{-2}$ | $p = 0.010$ |
| Fixed effect band                   | $-3.87 \times 10^{-2}$ | $\pm 1.41 \times 10^{-2}$ | $p < 0.001$ |
| Interaction effect SI:stimulus      | $-1.74 \times 10^{-4}$ | $\pm 2.39 \times 10^{-4}$ | $p = 0.155$ |
| Interaction effect SI:band          | $-4.43 \times 10^{-4}$ | $\pm 2.14 \times 10^{-4}$ | $p < 0.001$ |
| Interaction effect SI:band:stimulus | $-1.28 \times 10^{-5}$ | $\pm 2.25 \times 10^{-4}$ | $p = 0.912$ |

Speech Intelligibility (SI), Confidence Interval (CI)

**Table 3.** Linear Mixed Effect Model of envelope reconstruction in function of SNR

| Linear mixed effect model (factor)   | beta value             | CI(95%)                   | p-value     |
|--------------------------------------|------------------------|---------------------------|-------------|
| Fixed effect SNR                     | $7.75 \times 10^{-3}$  | $\pm 1.39 \times 10^{-3}$ | $p < 0.001$ |
| Fixed effect stimulus                | $-1.25 \times 10^{-2}$ | $\pm 1.06 \times 10^{-2}$ | $p = 0.022$ |
| Fixed effect band                    | $-8.10 \times 10^{-2}$ | $\pm 1.06 \times 10^{-2}$ | $p < 0.001$ |
| Interaction effect SNR:stimulus      | $-1.01 \times 10^{-3}$ | $\pm 1.83 \times 10^{-3}$ | $p = 0.284$ |
| Interaction effect SNR:band          | $-3.20 \times 10^{-3}$ | $\pm 1.83 \times 10^{-3}$ | $p < 0.001$ |
| Interaction effect SNR:band:stimulus | $-1.40 \times 10^{-6}$ | $\pm 2.13 \times 10^{-3}$ | $p = 0.999$ |

Speech-to-Noise Ratio (SNR), Confidence Interval (CI)

## Appendix A

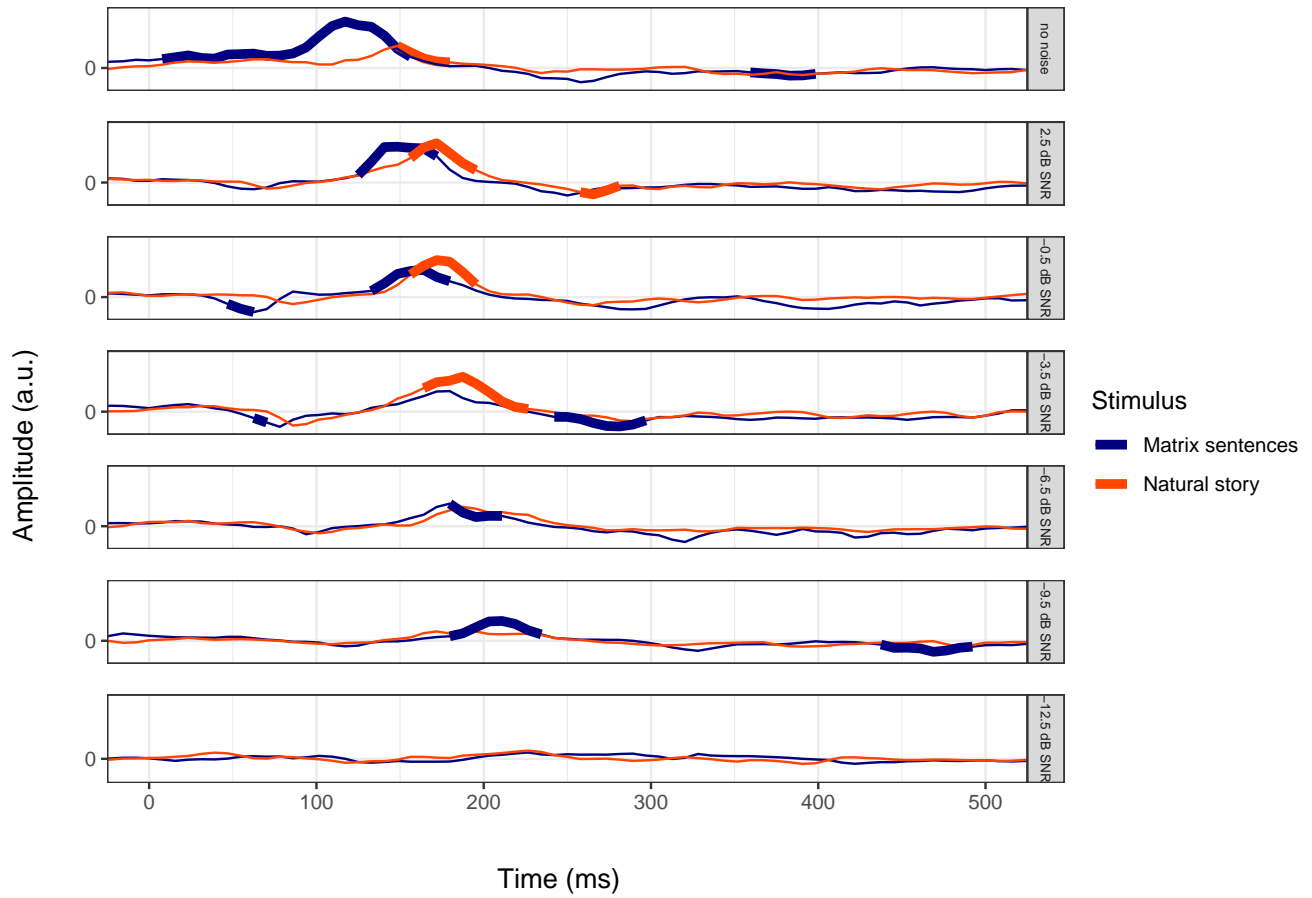

**Figure 1.** Time-course of the centro-frontal TRFs over participants for the Matrix sentences and the story. TRF samples significantly different from zero are highlighted in bold.
